# Supplementary material for: Recruitment of C4b-binding protein is not a complement evasion strategy employed by Staphylococcus aureus
Source: PubMed Central journal article supplement (PMC10569063; doi:10.1099/mic.0.001391), 2023-09-05
Supplement: mic-169-1391-s001.pdf [file mic-169-1391-s001.pdf]

1 **Supplementary Material**

2 **Recruitment of C4b-binding protein is not a complement evasion**  
3 **strategy employed by *Staphylococcus aureus***

4  
5 Shuxian Li<sup>1</sup>, Serena Bettoni<sup>2</sup>, Frida Mohlin<sup>2</sup>, Joan A. Geoghegan<sup>3</sup>, Anna M. Blom<sup>2</sup> and  
6 Maisem Laabei<sup>1\*</sup>.

7  
8 1: Department of Life Sciences, University of Bath, Bath, BA2 7AY, United Kingdom

9 2: Division of Medical Protein Chemistry, Department of Translational Medicine, Lund  
10 University, Malmö, Sweden.

11 3: Institute of Microbiology and Infection, University of Birmingham, Edgbaston, Birmingham,  
12 B15 2TT, United Kingdom

13  
14 For correspondence, please email [ml418@bath.ac.uk](mailto:ml418@bath.ac.uk)

15  
16 **Keywords:** *Staphylococcus aureus*, immune evasion, complement, C4b-binding protein

28 **Materials and Methods**

29 ***Western immunoblot of bacterial surface proteins***

30 *L. lactis* strains were grown O/N in M17 broth with 1% glucose. Bacterial cells were pelleted  
31 and normalised to OD600=40 in digestion buffer (50 mM Tris-HCL, 20 mM MgCl<sub>2</sub>, 30% [w/v]  
32 raffinose, pH7.5) containing protease inhibitor cocktail Set VII (Merck). Cell wall proteins were  
33 solubilized by digestion with lysozyme for *L. lactis* (400 µg/mL) at 37°C for 1 h. Protoplasts  
34 were harvested by centrifugation (7,000 x *g*, 15 min), and 20 µL supernatants were boiled in  
35 sample buffer and subjected to SDS-PAGE using mPAGE™ Bis-Tris 4-12% Precast Gels  
36 (Merck). SDS-PAGE gels electro-transferred onto nitrocellulose membranes, blocked with 5%  
37 skimmed milk and probed with either swine anti-rabbit HRP (1:2000, abcam) for Spa or rabbit  
38 anti-SdrE serum (1:1000) for SdrE. Rabbit anti-SdrE were detected by swine anti-rabbit- HRP  
39 and bound antibody were visualised using Amersham ECL start western blotting detection  
40 reagent (Cytiva).

41  
42  
43  
44  
45  
46  
47  
48  
49  
50  
51  
52  
53  
54

55 **Supplementary Figures:**

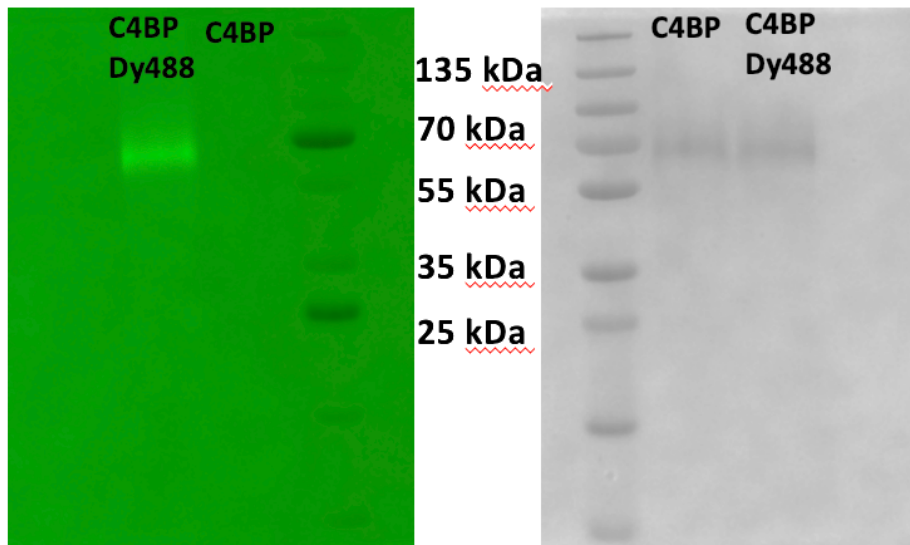

56

57 **Supplementary Figure 1: Dy488-labelled plasma purified C4BP.** Plasma purified C4BP was  
58 labelled with DyLight-488 as described in Methods. SDS-PAGE (10% w/v acrylamide /  
59 bisacrylamide) was loaded with 3 µg of either labelled or unlabelled C4BP. The reduced  
60 samples were imaged using a fluorescent gel imaging system (Azure Biosystems) or stained  
61 with Coomassie brilliant blue revealing a protein band corresponding to the α-chain of C4BP  
62 (~70 kDa).

63

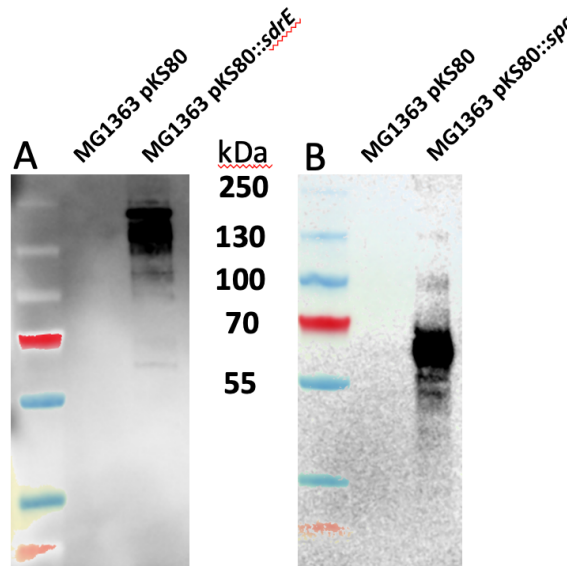

64

65

66 **Supplementary Figure 2: Expression of SdrE and Spa in *S. aureus* JE2 and *L. lactis* MG1363.**  
67 Surface proteins of *S. aureus* strain JE2 or *L. lactis* strain MG1363 harbouring either empty  
68 expression vector pKS80, pKS80 expressing SdrE or pKS80 expressing Spa were extracted as  
69 described in the Materials and Methods. **A)** SdrE expression was confirmed using rabbit anti-  
70 SdrE serum and swine anti-rabbit HRP secondary antibody. SdrE expression is noted as a band  
71 at ~180kDa **B)** Spa expression was confirmed using swine anti-rabbit IgG-HRP, noted as a band  
72 at ~60kDa.

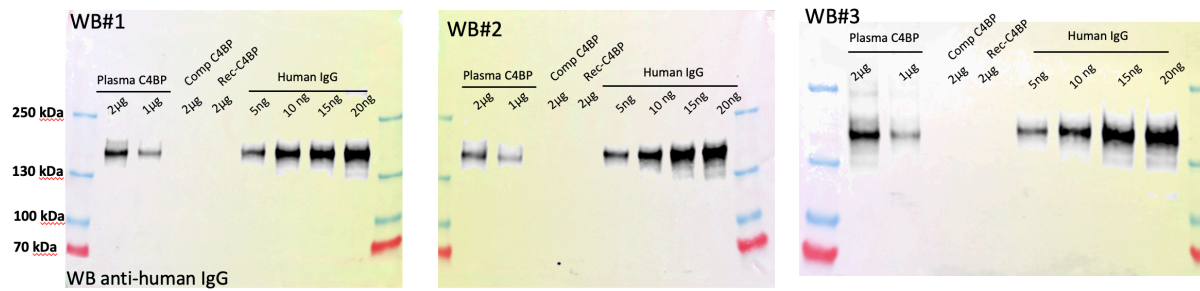

73

74 **Supplementary Figure 3: IgG contamination of C4BP measured using western blot.** Plasma  
 75 C4BP (1 and 2 µg), compC4BP (2 µg), recC4BP (2 µg) and purified human IgG at concentrations  
 76 between 5-20 ng were subjected to a non-reducing SDS-PAGE (5% w/v acrylamide /  
 77 bisacrylamide) and probed for human IgG contamination using goat anti-human IgG-HRP  
 78 revealing a band corresponding to non-reduced human IgG (~150 kDa). Western blot analysis  
 79 was performed in triplicate.

80

81
